# Supplementary material for: The Characterization of a Novel Phage, pPa_SNUABM_DT01, Infecting Pseudomonas aeruginosa
Source: MDPI journal article supplement (doi:10.3390/microorganisms9102040), 2021-09-27
Supplement: s1 [file s1]

**Supplementary Table S1.** Categories and homologies of the putative functional ORFs in pPa\_SNUABM\_DT01.

| Functional group                                  | Locus tag  | Encoded protein [Conserved domain]                                                                                                                                                       | Related organism          | BLASTp e-value |
|---------------------------------------------------|------------|------------------------------------------------------------------------------------------------------------------------------------------------------------------------------------------|---------------------------|----------------|
| DNA replication and nucleotide metabolism protein | PA10_00008 | putative ribonucleoside-diphosphate reductase subunit beta<br>[Ribonucleotide Reductase, R2/beta subunit, ferritin-like diiron-binding domain (cd01049);<br>NCBI_Conserved_Domain_v3.18] | Pseudomonas phage Noxifer | 0              |
|                                                   | PA10_00009 | putative ribonucleotide reductase subunit beta<br>[Ribonucleotide reductase, alpha subunit (KOG1112);<br>COG_KOG_v1.0]                                                                   | Candidimonas sp.          | 0              |
|                                                   | PA10_00012 | putative deoxycytidine triphosphate deaminase<br>[DCD; 2'-deoxycytidine 5'-triphosphate deaminase (DCD) (PF06559.12); Pfam-A_v33.1]                                                      | Pseudomonas phage Noxifer | 7E-69          |
|                                                   | PA10_00021 | putative helicase<br>[DnaB-like helicase C terminal domain (PF03796.16);<br>Pfam-A_v33.1; putative DnaB helicase]                                                                        | Erwinia phage vB_EamM_RAY | 2.00E-81       |
|                                                   | PA10_00025 | putative non-virion-associated RNA polymerase subunit beta/beta'<br>[putative nvRNAP similar to phiKZ123 protein]                                                                        | Ralstonia phage RSF1      | 2.00E-84       |
|                                                   | PA10_00030 | putative crossover junction endodeoxyribonuclease<br>[RuvC; Crossover junction endodeoxyribonuclease RuvC(PF02075.18); Pfam-A_v33.1]                                                     | Vibrio phage pVa-21       | 2E-13          |
|                                                   | PA10_00054 | putative 2OG-Fe(II) oxygenase<br>[2OG-Fe(II) oxygenase (PF13759.7); Pfam-A_v33.1]                                                                                                        | Ralstonia phage RSF1      | 1E-15          |
|                                                   | PA10_00056 | hypothetical protein<br>[Putative 2OG-Fe(II) oxygenase (PF13759.7); Pfam-A_v33.1]                                                                                                        | Psychrobacter sp. PRwf-1  | 3.30E-02       |
|                                                   | PA10_00057 | radical SAM protein<br>[Radical_SAM; Radical_SAM. Radical SAM superfamily (cd17853); NCBI_Conserved_Domain_v3.18]                                                                        | Dysosmobacter sp. BX15    | 1.00E-60       |
|                                                   | PA10_00058 | radical SAM protein<br>[Radical_SAM; Radical_SAM. Radical SAM superfamily (cd17853); NCBI_Conserved_Domain_v3.18]                                                                        | Dysosmobacter sp. BX15    | 2.00E-160      |
|                                                   | PA10_00059 | radical SAM protein<br>[Radical_SAM; Radical_SAM. Radical SAM superfamily (cd17853); NCBI_Conserved_Domain_v3.18]                                                                        | Ralstonia phage RSF1      | 3.00E-75       |
|                                                   | PA10_00060 | radical SAM protein<br>[Radical_SAM; Radical_SAM. Radical SAM superfamily (cd17853); NCBI_Conserved_Domain_v3.18]                                                                        | Ralstonia phage RSF1      | 1.00E-149      |

|            |                                                                                                                                                                                                                                  |                                 |          |
|------------|----------------------------------------------------------------------------------------------------------------------------------------------------------------------------------------------------------------------------------|---------------------------------|----------|
|            | Radical_SAM; Radical_SAM. Radical SAM superfamily (cd17853); NCBI_Conserved_Domain_v3.18                                                                                                                                         |                                 |          |
| PA10_00062 | radical SAM protein<br>[Radical_SAM; Radical_SAM. Radical SAM superfamily (cd17853); NCBI_Conserved_Domain_v3.18]                                                                                                                | Ralstonia phage<br>RSF1         | 1.00E-33 |
| PA10_00066 | radical SAM protein<br>[Radical_SAM; Radical_SAM. Radical SAM superfamily (cd17853); NCBI_Conserved_Domain_v3.18]                                                                                                                | Agrobacterium<br>phage Atu_ph07 | 5E-77    |
| PA10_00072 | putative SbcC ATPase<br>[exonuclease SbcC (TIGR00618); TIGRFAMs_v15.0]                                                                                                                                                           | Ralstonia phage<br>RP12         | 3.00E-83 |
| PA10_00077 | putative ribonuclease H<br>[rnhA; ribonuclease H (PRK00203); PRK_v6.9]                                                                                                                                                           | Xanthomonas phage<br>Xoo-sp14   | 8.00E-84 |
| PA10_00080 | putative UvsX protein<br>[UVSX_BPT4 Recombination and repair protein<br>OS=Enterobacteria phage T4 OX=10665 GN=UVSX PE=1<br>SV=2 (P04529); Uniprot-SwissProt-viral70_23_Aug_2020]                                                | Ralstonia phage<br>RP12         | 2E-105   |
| PA10_00082 | putative virion-associated RNA polymerase subunit<br>beta/beta'<br>[DNA-directed RNA polymerase subunit B' (PRK07225);<br>PRK_v6.9, putative vRNAP similar to phiKZ149 protein]                                                  | Pseudomonas virus<br>phiKZ      | 4.00E-46 |
| PA10_00092 | putative virion-associated RNA polymerase subunit<br>beta/beta'<br>[DNA-directed RNA polymerase subunit beta'<br>(PRK14906); PRK_v6.9, putative vRNAP similar to<br>phiKZ180 protein]                                            | Pseudomonas virus<br>phiKZ      | 2E-102   |
| PA10_00093 | putative virion-associated RNA polymerase subunit<br>beta/beta'<br>[rpoB; DNA-directed RNA polymerase subunit beta<br>(PRK00405); PRK_v6.9, putative vRNAP similar to<br>phiKZ178 protein]                                       | Pseudomonas virus<br>phiKZ      | 0        |
| PA10_00143 | putative DNA polymerase<br>[DNA_pol_B; DNA polymerase family B (PF00136.22);<br>Pfam-A_v33.1]                                                                                                                                    | Ralstonia phage<br>RP31         | 7e-164   |
| PA10_00148 | putative non-virion-associated RNA polymerase subunit<br>beta/beta'<br>[PRK09603; bifunctional DNA-directed RNA polymerase<br>subunit beta/beta'; Reviewed (PRK09603); PRK_v6.9,<br>putative nvRNAP similar to phiKZ055 protein] | Pseudomonas virus<br>phiKZ      | 1E-60    |
| PA10_00153 | putative nuclease SbcCD, subunit D<br>[DNA repair exonuclease SbcCD nuclease subunit<br>(COG0420); COG_KOG_v1.0]                                                                                                                 | Ralstonia phage<br>RP31         | 9e-74    |

|            |                                                                                                                                                                                                                  |                                |           |
|------------|------------------------------------------------------------------------------------------------------------------------------------------------------------------------------------------------------------------|--------------------------------|-----------|
| PA10_00160 | putative DNA-directed RNA polymerase beta/beta'<br>[PRK14844; bifunctional DNA-directed RNA polymerase subunit beta/beta'; Provisional (PRK14844); PRK_v6.9, putative nvRNAP similar to phiKZ071 protein]        | Pseudomonas virus<br>phiKZ     | 2E-49     |
| PA10_00161 | putative DNA-directed RNA polymerase subunit beta/beta'<br>[rpoC2; DNA-directed RNA polymerase subunit beta'; Provisional (PRK02597); PRK_v6.9, putative nvRNAP similar to phiKZ074 protein]                     | Pseudomonas virus<br>phiKZ     | 2E-69     |
| PA10_00163 | putative helicase<br>[UVSW_BPT4 ATP-dependent DNA helicase uvsW OS=Enterobacteria phage T4 OX=10665 GN=UvsW PE=1 SV=2 (P20703); Uniprot-SwissProt-viral70_23_Aug_2020]                                           | Xanthomonas phage<br>Xoo-sp14  | 2.00E-92  |
| PA10_00168 | putative DNA-directed RNA polymerase subunit beta/beta'<br>[DNA-directed RNA polymerase subunit beta'; Provisional (PRK00566); PRK_v6.9, putative vRNAP similar to phiKZ080 protein]                             | Pseudomonas virus<br>phiKZ     | 4.00E-53  |
| PA10_00176 | putative protein tyrosine phosphatase<br>[PTPH_AMEPV Putative tyrosine-protein phosphatase AMV078 OS=Amsacta moorei entomopoxvirus OX=28321 GN=AMV078 PE=3 SV=1 (Q9EMX1); Uniprot-SwissProt-viral70_23_Aug_2020] | -                              | -         |
| PA10_00191 | putative DNA polymerase<br>[DPOL_BPR69 DNA-directed DNA polymerase OS=Escherichia phage RB69 OX=12353 GN=43 PE=1 SV=1 (Q38087); Uniprot-SwissProt-viral70_23_Aug_2020]                                           | Xanthomonas phage<br>Xoo-sp14  | 1.00E-134 |
| PA10_00213 | hypothetical protein<br>[YpsA; YspA SLOG family (PF06908.12) domain protein; Pfam-A_v33.1]                                                                                                                       | Pantoea phage<br>vB_PagS_AAS21 | 6.00E-15  |
| PA10_00215 | putative thymidylate kinase<br>[thymidylate kinase (PRK13973); PRK_v6.9]                                                                                                                                         | Acidaminococcus<br>timonensis  | 2.00E-45  |
| PA10_00220 | putative NHN endonuclease<br>[putative NHN endonuclease (PHA00280); PRK_v6.9]                                                                                                                                    |                                |           |
| PA10_00235 | putative thymidylate synthase<br>[TYSY_BPT4 Thymidylate synthase OS=Enterobacteria phage T4 OX=10665 GN=TD PE=1 SV=1 (P00471); Uniprot-SwissProt-viral70_23_Aug_2020]                                            | Pseudomonas phage<br>Phabio    | 2E-63     |
| PA10_00241 | putative multifunctional tRNA nucleotidyl transferase                                                                                                                                                            | Pseudomonas<br>nitritireducens | 6.00E-169 |

|                                     |            |                                                                                                                                                                                    |                                   |            |
|-------------------------------------|------------|------------------------------------------------------------------------------------------------------------------------------------------------------------------------------------|-----------------------------------|------------|
|                                     |            | [cca; multifunctional tRNA nucleotidyl transferase/2'3'-cyclic phosphodiesterase/2'nucleotidase/phosphatase; Reviewed (PRK10885); PRK_v6.9]                                        |                                   |            |
|                                     | PA10_00270 | putative homing endonuclease<br>[GIY-YIG nuclease superfamily protein (PRK00329); PRK_v6.9]                                                                                        | Pseudomonas phage<br>Psa21        | 3E-13      |
|                                     | PA10_00271 | putative ClpXP protease specificity-enhancing factor<br>[ClpXP protease specificity-enhancing factor (PRK11798); PRK_v6.9]                                                         | Hafnia alvei                      | 0.00000002 |
|                                     | PA10_00273 | putative DNA ligase<br>[DNA_ligase_aden; NAD-dependent DNA ligase adenylation domain (PF01653.19); Pfam-A_v33.1]                                                                   | Melittangium<br>boletus           | 7E-122     |
|                                     | PA10_00276 | putative dihydrofolate reductase<br>[DHFR_1; Dihydrofolate reductase (PF00186.20); Pfam-A_v33.1]                                                                                   | Sporosarcina sp.<br>HYO08         | 1E-22      |
|                                     | PA10_00283 | putative nudix hydrolase<br>[PLN02325; nudix hydrolase]                                                                                                                            | Thalassomonas<br>viridans         | 2.00E-49   |
|                                     | PA10_00286 | hypothetical protein<br>[Nudix_Hydrolase; uncharacterized Nudix hydrolase subfamily (cd18881) protein; NCBI_Conserved_Domains_v3.18]                                               | -                                 | -          |
|                                     | PA10_00288 | putative ATPase<br>[AAA domain (cd00009) containing protein]                                                                                                                       | Erwinia phage<br>pEa_SNUABM_50    | 1.00E-19   |
|                                     | PA10_00290 | putative protease<br>[protease_HslV (cd01913) protein; NCBI_Conserved_Domains_v3.18; putative protease HslV]                                                                       | Bdellovibrionaceae<br>bacterium   | 3E-16      |
|                                     | PA10_00307 | putative ATP-dependent helicase<br>[ATP-dependent helicase HepA (PRK04914); PRK_v6.9]                                                                                              | Ralstonia phage<br>RP12           | 6.00E-170  |
| structural and packaging<br>protein | PA10_00013 | putative prohead core protein protease<br>[Peptidase_S77; Prohead core protein serine protease (PF03420.14); Pfam-A_v33.1]                                                         | -                                 | -          |
|                                     | PA10_00023 | putative major capsid protein                                                                                                                                                      | Xanthomonas phage<br>Xoo-sp14     | 2.00E-107  |
|                                     | PA10_00071 | putative central spike protein<br>[BP45_BPMU Baseplate puncturing device gp45 OS=Escherichia phage Mu OX=10677 GN=Mup45 PE=1 SV=1 (Q9T1V4); Uniprot-SwissProt-viral70_23_Aug_2020] | Salmonella phage<br>vB_SalM_SA002 | 1E-38      |
|                                     | PA10_00097 | putative prohead core protein protease<br>[Peptidase_S77; Prohead core protein serine protease (PF03420.14); Pfam-A_v33.1]                                                         | Ralstonia phage<br>RP31           | 2.00E-49   |

|                               |            |                                                                                                                                                                                                      |                                      |           |
|-------------------------------|------------|------------------------------------------------------------------------------------------------------------------------------------------------------------------------------------------------------|--------------------------------------|-----------|
|                               | PA10_00108 | putative tail tube protein<br>[BP54_BPT4 Baseplate tail-tube junction protein<br>gp54OS=Enterobacteria phage T4 OX=10665 GN=54 PE=1<br>SV=1 (P13341); Uniprot-SwissProt-viral70_23_Aug_2020]         | Xanthomonas phage<br>Xoo-sp14        | 2.00E-68  |
|                               | PA10_00109 | putative tail sheath protein<br>[TSP_BPT4 Tail sheath protein OS=Enterobacteria phage<br>T4 OX=10665 GN=18 PE=1 SV=5 (P13332); Uniprot-<br>SwissProt-viral70_23_Aug_2020]                            | Ralstonia phage<br>RP12              | 4.00E-115 |
|                               | PA10_00113 | putative terminase large subunit<br>[Terminase_1; Phage Terminase (PF03354.16); Pfam-<br>A_v33.1]                                                                                                    | Xanthomonas phage<br>Xoo-sp14        | 3.00E-180 |
|                               | PA10_00128 | hypothetical protein<br>[PHUZ_BPDPK Phage tubulin-like protein<br>OS=Pseudomonas phage phiKZ OX=169683<br>GN=PHIKZ039 PE=1 SV=1 (Q8SDC3); Uniprot-SwissProt-<br>viral70_23_Aug_2020]                 | Erwinia phage<br>PhiEaH1             | 3E-20     |
|                               | PA10_00171 | putative baseplate hub assembly protein<br>[GP26_BPT4 Baseplate hub assembly protein gp26<br>OS=Enterobacteria phage T4 OX=10665 GN=26 PE=1 SV=2<br>(P13335); Uniprot-SwissProt-viral70_23_Aug_2020] | Bacillus phage<br>vB_BspM_AgentSmith | 3E-33     |
|                               | PA10_00200 | putative internal head protein<br>[phiKZ_IP; phiKZ-like phage internal head proteins<br>(PF12699.8); Pfam-A_v33.1]                                                                                   | -                                    | -         |
|                               | PA10_00201 | putative internal head protein<br>[phiKZ_IP; phiKZ-like phage internal head proteins<br>(PF12699.8); Pfam-A_v33.1]                                                                                   | -                                    | -         |
| lysis related protein         | PA10_00052 | putative transglycosylase                                                                                                                                                                            | Erwinia phage<br>PhiEaH1             | 6E-76     |
|                               | PA10_00091 | putative tail-associated endolysin<br>[EXLYS_BPDPK Peptidoglycan hydrolase gp181<br>OS=Pseudomonas phage phiKZ OX=169683 PE=1 SV=1<br>(Q8SCY1); Uniprot-SwissProt-viral70_23_Aug_2020]               | -                                    | -         |
|                               | PA10_00165 | putative hydrolase<br>[putative hydrolase (PRK10119); PRK_v6.9]                                                                                                                                      | Erwinia phage<br>pEa_SNUABM_43       | 2E-21     |
|                               | PA10_00243 | putative hydrolase<br>[putative hydrolase (PRK10119); PRK_v6.9]                                                                                                                                      | Pseudomonas phage<br>PaBG            | 5E-21     |
| Additional functional protein | PA10_00001 | putative concanavalin A-like lectin/glucanases<br>superfamily protein<br>[Laminin_G_3 (PF13385); Pfam-A_v33.1]                                                                                       | Proteobacteria<br>bacterium          | 1E-27     |
|                               | PA10_00002 | putative concanavalin A-like lectin/glucanases<br>superfamily protein                                                                                                                                | Proteobacteria<br>bacterium          | 1E-22     |

|      |            |                                                                                                                          |                                           |             |
|------|------------|--------------------------------------------------------------------------------------------------------------------------|-------------------------------------------|-------------|
|      | PA10_00003 | [Laminin_G_3 (PF13385); Pfam-A_v33.1]<br>putative concanavalin A-like lectin/glucanases<br>superfamily protein           | Candidatus<br>Taylorbacteria<br>bacterium | 0.000000002 |
|      | PA10_00254 | [Laminin_G_3 (PF13385); Pfam-A_v33.1]<br>hypothetical protein                                                            | -                                         | -           |
|      | PA10_00256 | [PyocinActivator; Pyocin activator protein PrtN<br>(PF11112.9) containing protain; Pfam-A_v33.1]<br>hypothetical protein | -                                         | -           |
|      | PA10_00258 | [Laminin_G_3 domain (PF13385) containing protein]<br>hypothetical protein                                                | -                                         | -           |
|      |            | [Laminin_G_3 domain (PF13385) containing protein]                                                                        |                                           |             |
| tRNA | PA10_00179 | tRNA-Asn                                                                                                                 | -                                         | -           |
|      | PA10_00180 | tRNA-Asp                                                                                                                 | -                                         | -           |

**Supplementary Figure S1.** Whole genome comparative analysis of pPa\_SNUABM\_DT01, and *Myoviridae* phages

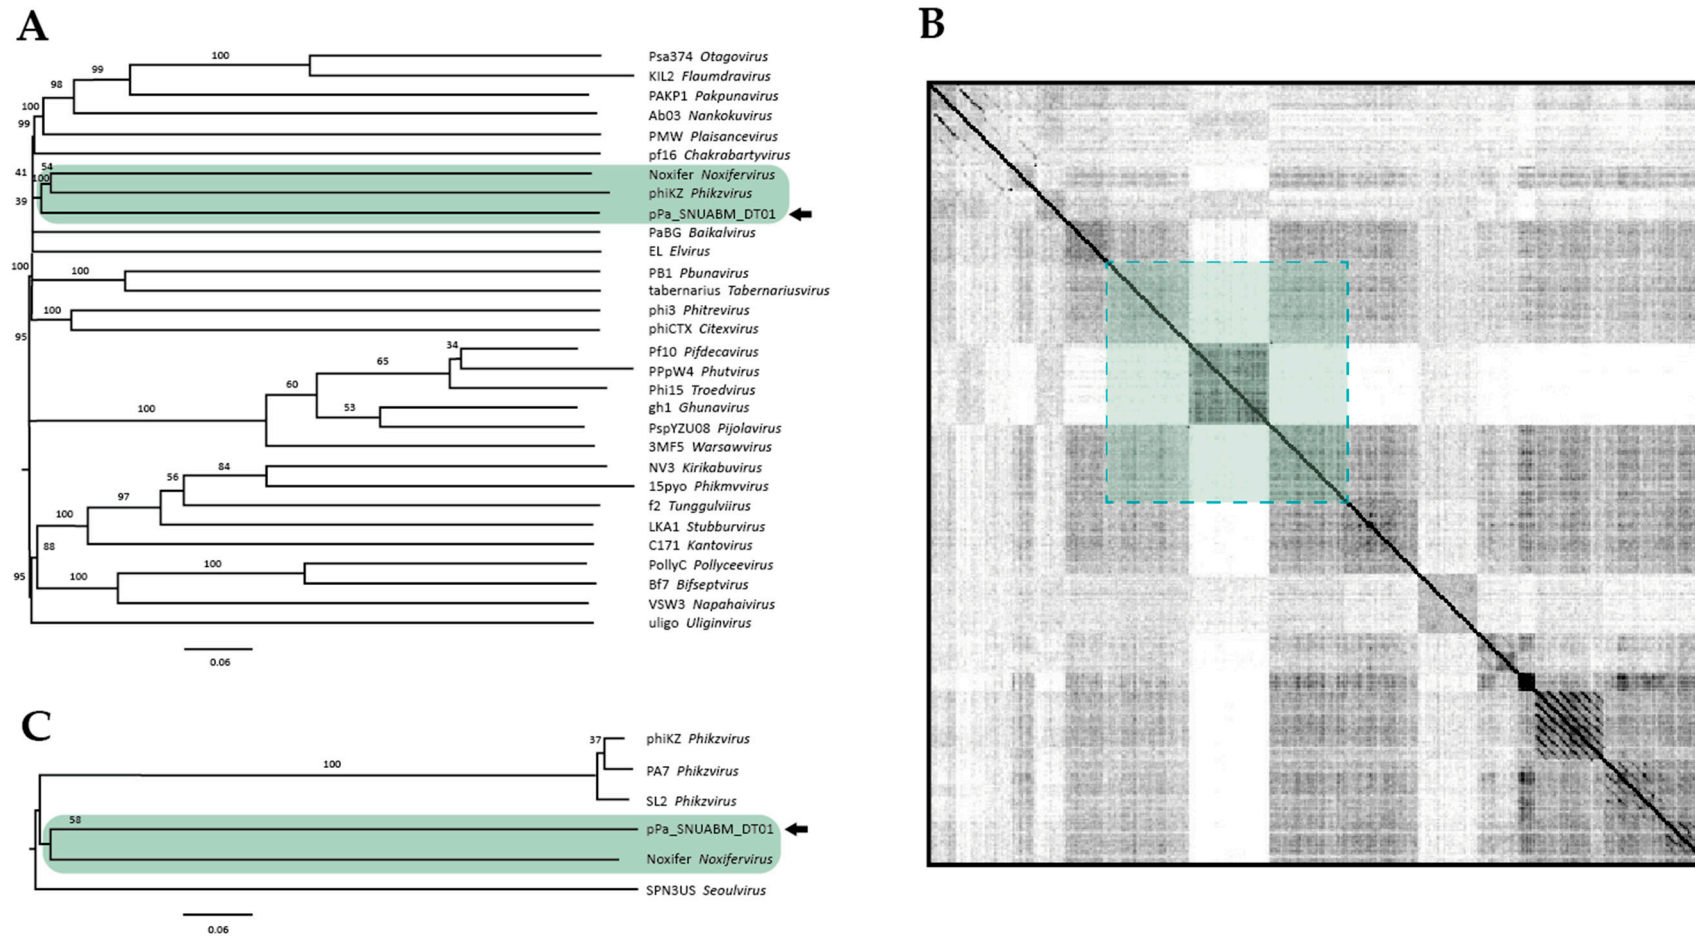

Green box; the cluster including pPa\_SNUABM\_DT01. (A) Phylogenetic tree constructed using VICTOR with genome sequences of genera belonging to *Myoviridae*. (B) Dot plot constructed with concatenated genome sequences used in (A) phylogeny. (C) Phylogenetic tree constructed using VICTOR with genome sequences belonging to *Noxifervirus* and *Phikzvirus*.
